# Supplementary material for: Distinct roles of retinoic acid and BMP4 pathways in the formation of chicken primordial germ cells and spermatogonial stem cells
Source: Royal Society of Chemistry journal article supplement (doi:10.1039/c9fo01485c), 2019-01-01
Supplement: c9fo01485c2.pdf [file c9fo01485c2.pdf]

Supplementary Table1 Induction of PGC and SSC by different inducers and their combinations

| Inducer         | PGC Formation | SSC Formation |
|-----------------|---------------|---------------|
| RA+Laminin      | +             | +             |
| BMP4            | +             | +             |
| Testosterone    | -             | -             |
| FSH             | -             | -             |
| Collagen        | -             | -             |
| fibronectin     | -             | -             |
| RA+Testosterone | +             | +             |
| RA+FSH          | +             | +             |
| RA+Collagen     | +             | +             |
| RA+fibronectin  | +             | +             |
