# Supplementary material for: Distinct roles of retinoic acid and BMP4 pathways in the formation of chicken primordial germ cells and spermatogonial stem cells
Source: Royal Society of Chemistry journal article supplement (doi:10.1039/c9fo01485c), 2019-01-01
Supplement: c9fo01485c9.pdf [file c9fo01485c9.pdf]

Supplementary Table2 Primer sequence for qRT-PCR

| Gene                | Gene ID        | Primer sequence                                           |
|---------------------|----------------|-----------------------------------------------------------|
| Lin28               | NM_001031774.2 | F:TGCGATGCTGGACTCACC<br>R:CGCTGCCAATGCAGAAGA              |
| Integrin $\alpha$ 6 | NM_205289.1    | F:GCTGGAAACATGGACCTGGATAA<br>R:TTCAGGTCAAGTTTGTCCAGGCTGTA |
| Stra8               | XM_015289566.2 | F:CCACGGCTATTTACACCTCTG<br>R:GCTCTTGGCAAGCATCCGTA         |
| Pax6                | NM_205066.1    | F:CCCCGTTTCCTCTTTTAC<br>R:GCATAGGCAGGTTGTTGG              |
| FLK1                | NM_001004368.1 | F:CTCAGAGTCATAGGCAACG<br>R:CACCAACCGAAGTCACAA             |
| Gata6               | NM_205420.1    | F:GAGGGACGGCACCGGGAATT<br>R:TGGCAGTTGGCACAGGACA           |
| BMP4                | NM_205237.3    | F:AGTGATGAAGCCGCTGTCTG<br>R:GCCCTGATGAGTCTGTGCC           |
| c-Myc               | NM_001030952.1 | F:CCCCGTCCGAGGACATCT<br>R:GCGGTGGAAGGGAAGCAG              |
| PITX2               | NM_205010.1    | F:GGGTTCCGGTTTGGTTCA<br>R:TGGCTGCCAGTTGTTGTA              |
| ID4                 | NM_204282.1    | F:CAAGCGGGTCAGCAAAGTGG<br>R:ACCGGGTCGGTGTGAGGG            |
| ID1                 | NM_204590.2    | F:ACGTGATCGACTACATCTGGGA<br>R:GCGGCACAGTATGCGGTC          |
| Prdm6               | XM_015280835.2 | F:GCGATCCGTAGTATTTCCACA<br>R:GTCTTAAAGCACTGCCACAT         |
| Prdm14              | XM_025147991.1 | F:CCGTTCCAAGGCAAAGTGG<br>R:CGCCGTCAGGTTCTGCTCC            |
| ADH5                | NM_001031152.2 | F:TTTGGTTTAGGAGGAGTTG<br>R:TTGGCATAGGTATTCTTGT            |
| ADH1A1              | NM_204577.4    | F:ACACCTCTGAGTGCCCTTTA<br>R:GGTCTCCCTGCTGCTTC             |
| SOX2                | NM_205188.2    | F:GAAGATGCACAACCTCGGAGATCAG<br>R:GAGCCGTTTGGCTTCGTC       |
| Oct4                | NM_001110178.1 | F:GGAGCAGTTTGCCAAGGA<br>R:GAAGCGGCAGATGGTGGT              |
| Nanog               | NM_001146142.1 | F:TGGTTTCAGAACCAACGAATGAAG<br>R:TGCACTGGTCACAGCCTGAAG     |
| P300                | XM_004937710   | F:ACCCAATGGAACAAGAAG<br>R:GGTCCTGACGGTAAAGTG              |
| DAZL                | NM_204218.1    | F:ACCCATTCGTCAACAACC<br>R:CACCTCCTTCACAGTACCATAT          |
| Smad5               | NM_001014968.1 | F:TCGCCAACAGTCCCTAT<br>R:GCAGGAGGTGGAGTATCA               |

---

|         |                |                                                    |
|---------|----------------|----------------------------------------------------|
| PCAF    | XM_015281803.2 | F:CCTGAACCAGAAGCCAAAC<br>R:CGGAAGCAGATACCACCA      |
| CREBBP  | XM_015294625.2 | F:AGAATTGTACTCGGCACG<br>R:TAGGATTACTTAGCGATGGA     |
| HDAC1   | NM_204156.1    | F:GAGACTGCTGTGGCTTTG<br>R:TTTGAGGGACTGATGTGC       |
| HDAC2   | NM_204831.2    | F:CTTGCCATCCTTGAGTTA<br>R:CAGCATAGTATTTGCCTTTT     |
| BMP5    | XM_015284820.2 | F:AACCACGCCATTGTTTCAG<br>R:CAAAGTAGAGCACGGAGAT     |
| CYP2C18 | NM_001001752.2 | F:TGGCAGAAGAGGTAAAGC<br>R:TGTCTCCGTTCCAGCAAT       |
| CYP1A1  | NM_205147.1    | F:CCAGAAGAAGATTCAGGCAGAG<br>R:AAGGGCAGGAGGGAGGAGTG |
| CYP2H1  | NM_001001616.1 | F:GAAGGGCATTGAGGAGCG<br>R:ATGGAGCAGATGATGTTGG      |
| CYP26A1 | NM_001001129.1 | F:ATCTGCGATACCCACGATG<br>R:ACCGAAAGGAATGAAACTGAAC  |
| Smurf1  | XM_015294374.2 | F:TCCACGACTACATCACATC<br>R:AGGCAACTCTCACCCCTC      |

---
