# Supplementary figures and images for: Distinct roles of retinoic acid and BMP4 pathways in the formation of chicken primordial germ cells and spermatogonial stem cells
Source: Royal Society of Chemistry journal article supplement (doi:10.1039/c9fo01485c), 2019-01-01

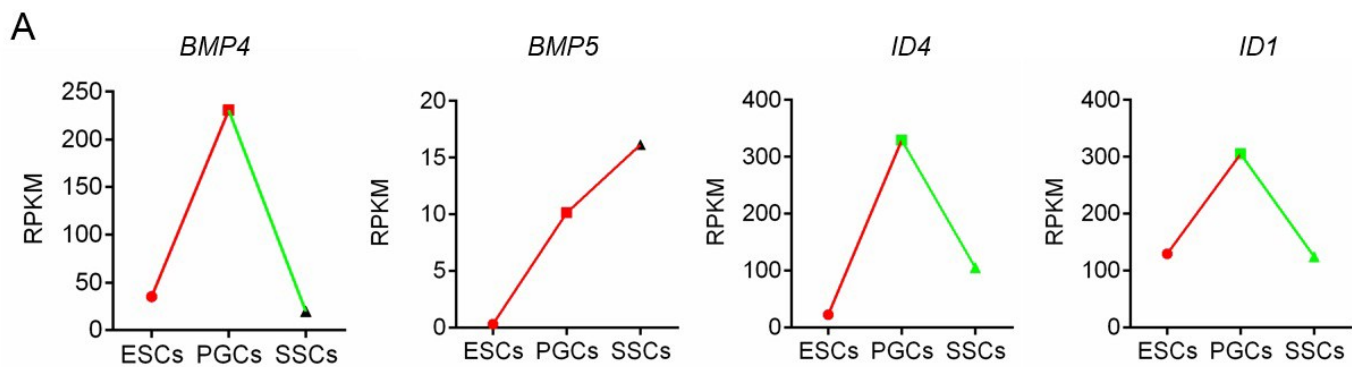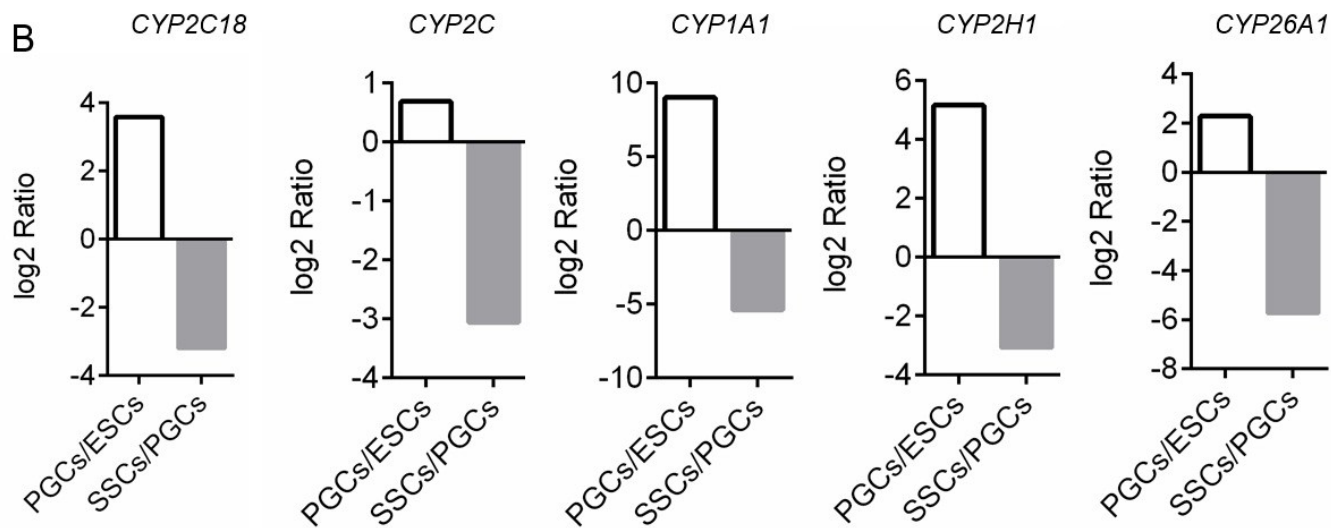

Supplement: c9fo01485c10.pdf [file c9fo01485c10.pdf]

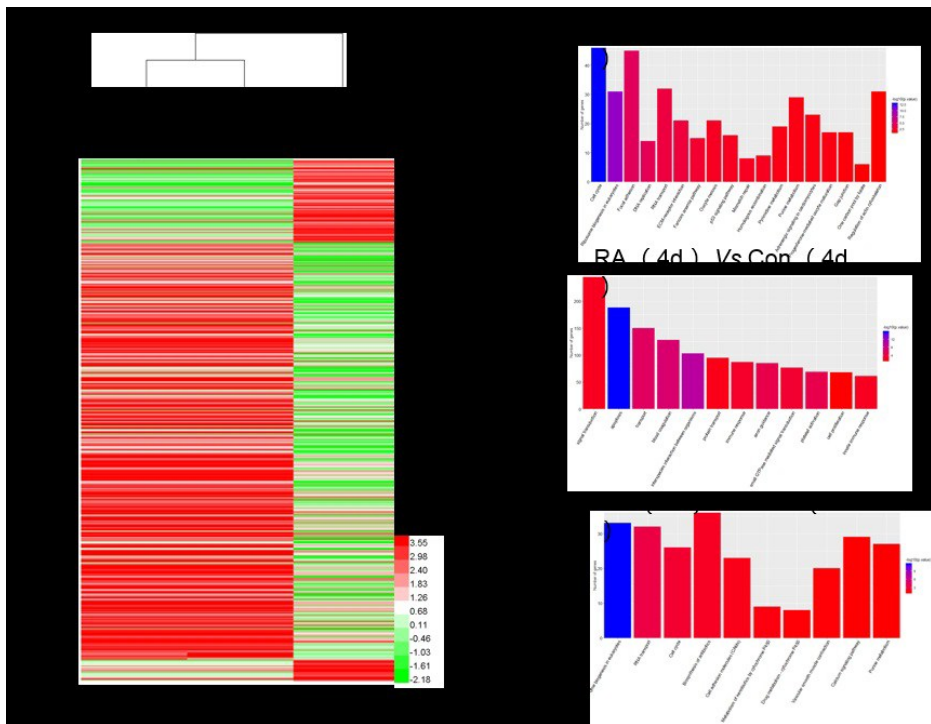

Supplement: c9fo01485c11.pdf [file c9fo01485c11.pdf]

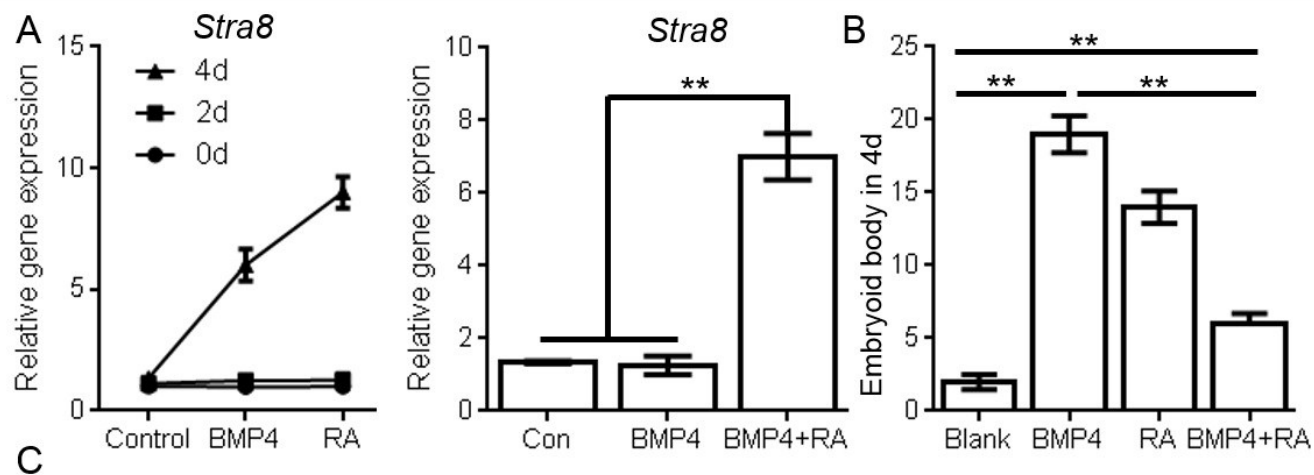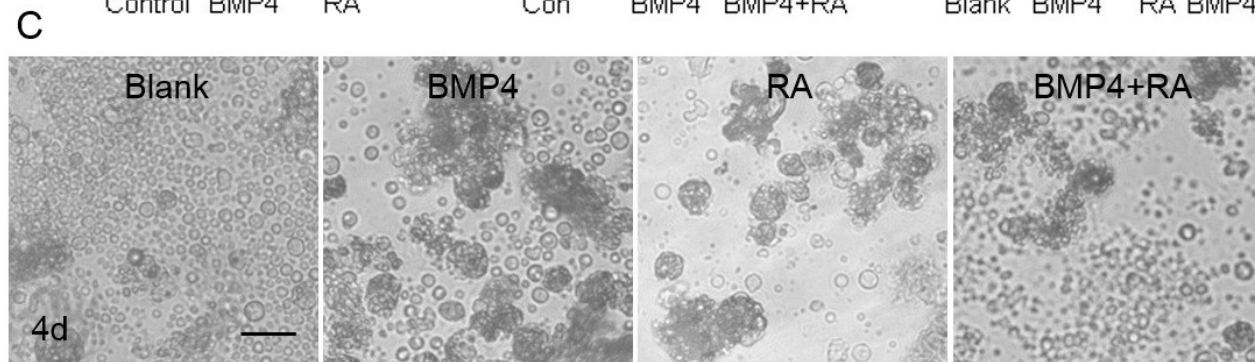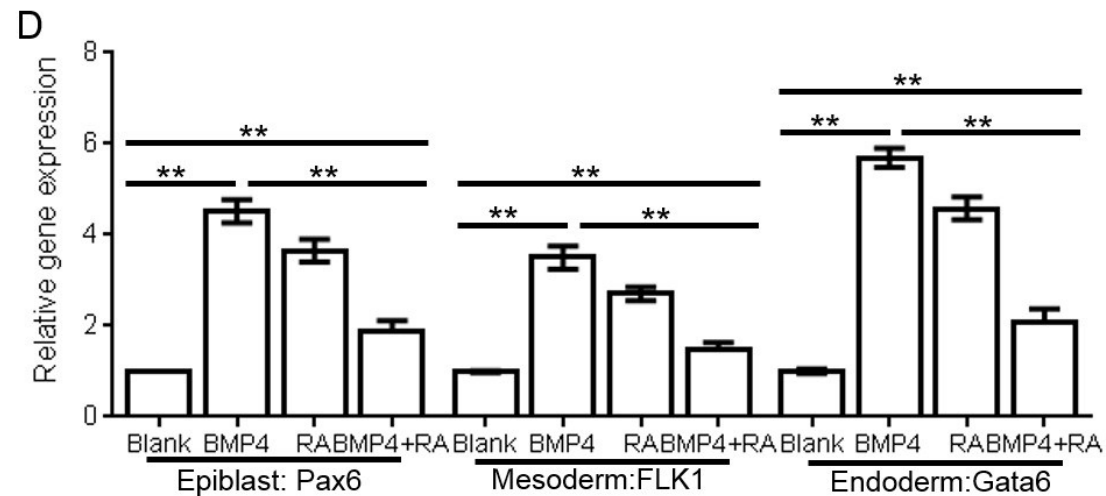

Supplement: c9fo01485c3.pdf [file c9fo01485c3.pdf]

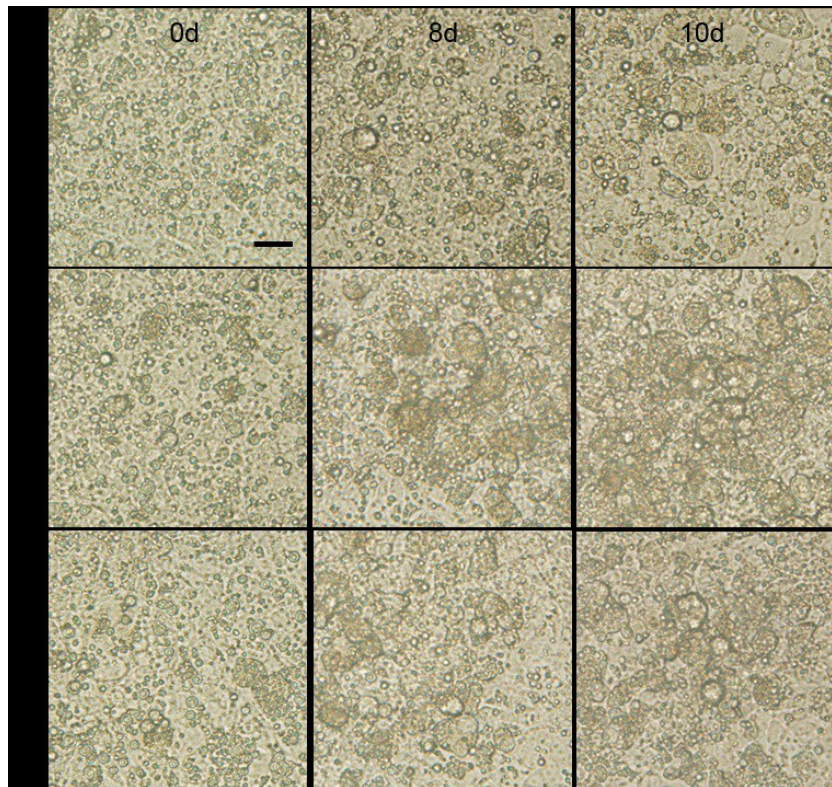

Supplement: c9fo01485c4.pdf [file c9fo01485c4.pdf]

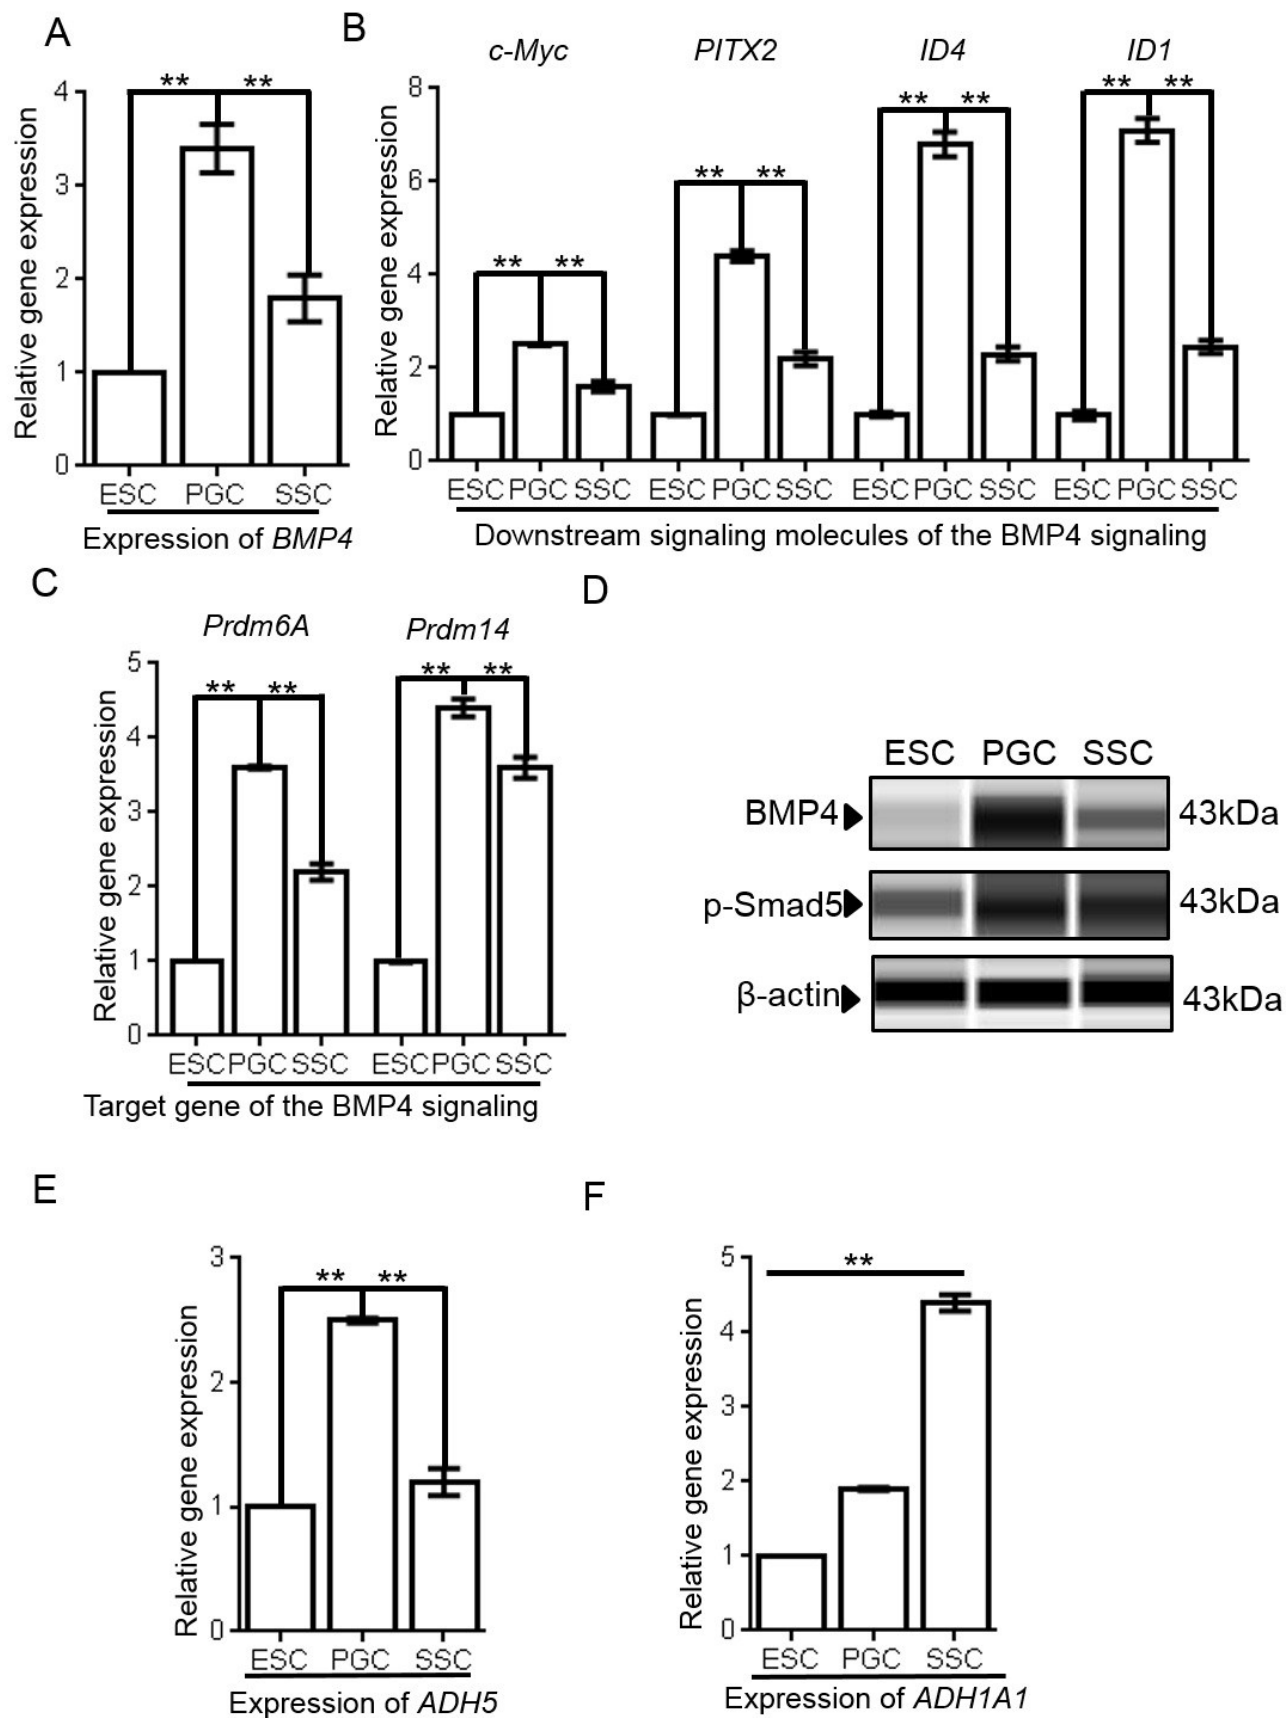

Supplement: c9fo01485c5.pdf [file c9fo01485c5.pdf]

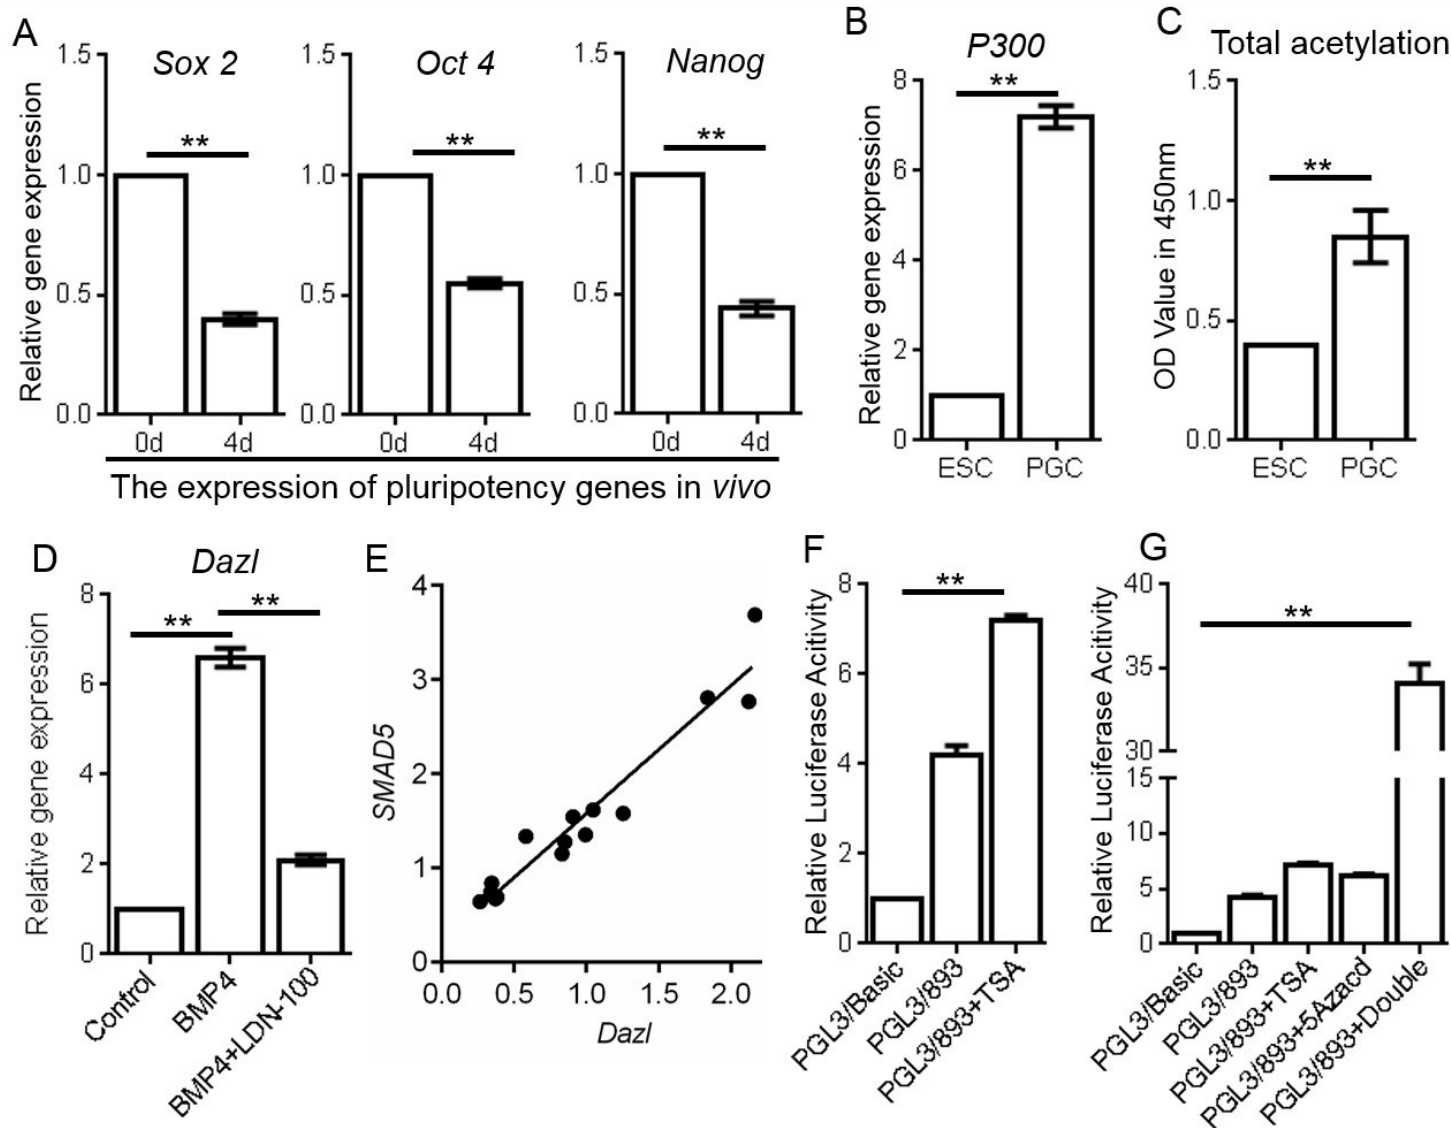

Supplement: c9fo01485c6.pdf [file c9fo01485c6.pdf]

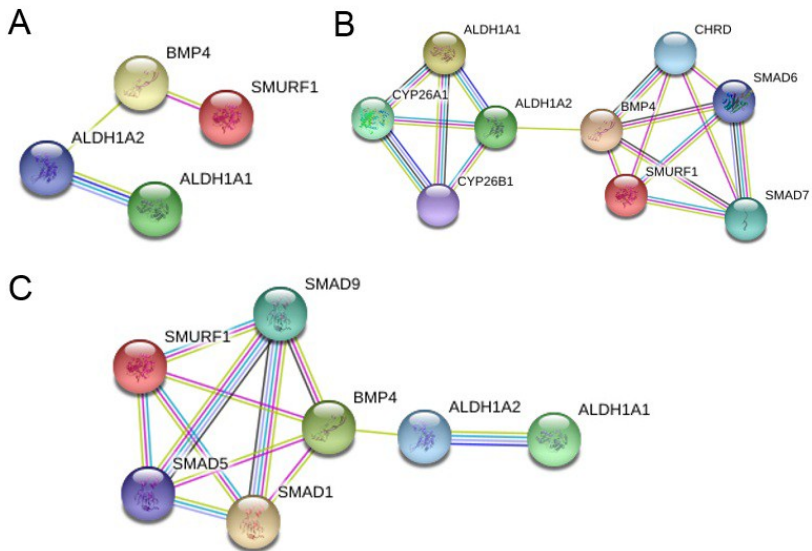

Supplement: c9fo01485c7.pdf [file c9fo01485c7.pdf]
